# Supplementary material
Source: Springer Nature journal article supplement (http://www.nature.com/nm/journal/vaop/ncurrent/extref/nm.2098-S1.pdf)
Supplement: nm.2098-S1.pdf [file nm.2098-S1.pdf]

Browse Articles
| Nature Medicine


Skip to main content

Thank you for visiting nature.com. You are using a browser version with limited support for CSS. To obtain
the best experience, we recommend you use a more up to date browser (or turn off compatibility mode in
Internet Explorer). In the meantime, to ensure continued support, we are displaying the site without styles
and JavaScript.

Advertisement


- View all journals
- Search
- Log in

- Explore content
- About the journal
- Publish with us

- Sign up for alerts
- RSS feed


1. nature
2. nature medicine
3. browse articles

# Browse Articles

## Filter By:

Article Type

All

- All
- Article (3156)
- Author Correction (164)
- Between Bedside and Bench (138)
- Book Review (402)
- Brief Communication (235)
- Comment (171)
- Commentary (273)
- Correspondence (493)
- Corrigendum (146)
- Editorial (380)
- Letter (893)
- Letters to the Editor (435)
- News (2911)
- News & Views (2247)
- News Feature (202)
- On the Market (250)
- Research Highlight (356)
- Research Highlights (292)
- Review Article (256)
- Technical Report (251)

Year

All

- All
- 2024 (259)
- 2023 (639)
- 2022 (570)
- 2021 (504)
- 2020 (502)
- 2019 (423)
- 2018 (372)
- 2017 (253)
- 2016 (298)
- 2015 (304)
- 2014 (418)
- 2013 (513)
- 2012 (576)
- 2011 (619)
- 2010 (570)
- 2009 (472)
- 2008 (430)
- 2007 (447)
- 2006 (492)
- 2005 (473)

- ### **Telemonitoring of patients with acute coronary syndrome**

  A randomized controlled trial involving a telemedicine-based approach for the management of patients with acute coronary syndrome had several clinical benefits relative to standard of care.

  - Sonia Muliyil

  Research Highlight29 Apr 2024
- ### AI-enabled electrocardiography alert intervention and all-cause mortality: a pragmatic randomized clinical trial

  In a randomized clinical trial, alerts based on the detection of abnormalities in electrocardiograms using a deep learning algorithm reduced all-cause mortality at 90 days in patients admitted to hospital emergency or internal medicine departments.

  - Chin-Sheng Lin
  - Wei-Ting Liu
  - Chin Lin

  Article29 Apr 2024
- ### The health risks of generative AI-based wellness apps

  AI-enabled wellness apps exist in a regulatory gray area and may pose risks if used to manage mental health issues; this Perspective outlines the possible risks to users and the implications for app developers and regulators.

  - Julian De Freitas
  - I. Glenn Cohen

  Perspective29 Apr 2024
- ### Influence of COVID-19 on trust in routine immunization, health information sources and pandemic preparedness in 23 countries in 2023

  A survey of 23,000 adults in 23 countries in 2023 reports that the pandemic experience reduced participants’ willingness to be vaccinated for COVID-19 and receive routine vaccinations and reduced trust in recommendations from public health authorities.

  - Jeffrey V. Lazarus
  - Trenton M. White
  - Ayman El-Mohandes

  Brief CommunicationOpen Access29 Apr 2024
- ### The argument framework is a flexible approach to evidence in healthcare

  An argument framework, grounded in the sciences of reasoning, provides an alternative to medicine’s measurement framework for evaluating and synthesizing evidence in healthcare.

  - Jonathan Fuller
  - Benjamin Chin-Yee
  - Ross E. G. Upshur

  Comment26 Apr 2024
- ### Bispecific T cell engager therapy for refractory rheumatoid arthritis

  In a case series of six patients with multidrug-resistant rheumatoid arthritis, the CD19xCD3-targeting bispecific T cell engager blinatumomab reduced disease activity and led to reductions in autoantibodies.

  - Laura Bucci
  - Melanie Hagen
  - Ricardo Grieshaber-Bouyer

  Article26 Apr 2024
- ### Reproductive rights in the United States: acquiescence is not a strategy

  Scientific and medical conferences should not be held in states that ban abortion, as such bans put the lives of women at risk.

  - Laura J. Esserman
  - Douglas Yee

  Comment25 Apr 2024
- ### Large language models for preventing medication direction errors in online pharmacies

  Tailored to detect and prevent potential medication direction errors in a digital pharmacy data processing pipeline, a large language model is shown to increase efficiency and decrease burden for technicians and pharmacists in a prospective application.

  - Cristobal Pais
  - Jianfeng Liu
  - Mohsen Bayati

  ArticleOpen Access25 Apr 2024
- ### Urgent action is needed to confront artemisinin partial resistance in African malaria parasites

  - Deus S. Ishengoma
  - Roly Gosling
  - Abdoulaye A. Djimde

  Correspondence25 Apr 2024
- ### New risk score for cardiovascular disease with improved performance

  QR4 is a new cardiovascular disease (CVD) risk score developed and evaluated in 16.9 million people that has better performance than other commonly used CVD risk scores. It includes nine new risk factors associated with increased risk of developing CVD (for example, a heart attack or stroke) over the next 10 years.

  Research Briefing23 Apr 2024
- ### Nivolumab for mismatch-repair-deficient or hypermutated gynecologic cancers: a phase 2 trial with biomarker analyses

  In a phase 2 trial, nivolumab achieved a response rate of 58% in patients with mismatch-repair-deficient gynecological cancers, meeting the primary endpoint, and genomic and immunologic features correlated with response.

  - Claire F. Friedman
  - Beryl L. Manning-Geist
  - Dmitriy Zamarin

  ArticleOpen Access23 Apr 2024
- ### Author Correction: Durability of neutralizing RSV antibodies following nirsevimab administration and elicitation of the natural immune response to RSV infection in infants

  - Deidre Wilkins
  - Yuan Yuan
  - Mark T. Esser

  Author CorrectionOpen Access22 Apr 2024
- ### The hype and hope of new food allergy treatments

  Food allergy treatment is undergoing a paradigm shift with new therapies emerging, including the recent FDA approval of omalizumab — but without evidence of disease modification and with uncertain quality-of-life improvement, it may not be a panacea for all.

  - Kirsten P. Perrett

  News & Views22 Apr 2024
- ### Strategies for controlling pneumococcal disease and outbreaks during humanitarian emergencies

  - Molly Cliff
  - Paul Welaga
  - Brenda Kwambana-Adams

  Correspondence22 Apr 2024
- ### Author Correction: Concurrent intrathecal and intravenous nivolumab in leptomeningeal disease: phase 1 trial interim results

  - Isabella C. Glitza Oliva
  - Sherise D. Ferguson
  - Michael A. Davies

  Author CorrectionOpen Access22 Apr 2024
- ### **mRNA therapy for a rare childhood disease**

  An mRNA-based drug aims to replace a faulty enzyme and restore metabolic function in children with propionic acidemia — with encouraging early clinical results.

  - Karen O’Leary

  Research Highlight22 Apr 2024
- ### **Repurposing a diabetes drug to treat Parkinson’s disease**

  In a multicenter clinical trial, patients with early-stage Parkinson’s disease treated with lixisenatide, a drug currently used for the treatment of diabetes, showed improvement in their motor scores compared with those on placebo.

  - Sonia Muliyil

  Research Highlight20 Apr 2024
- ### Using unlabeled data to enhance fairness of medical AI

  AI models for tasks such as pathology and dermatology struggle to generalize to new patient groups or hospitals that they were not trained on; learning more robust features from unlabeled data could prevent overfitting to the training distribution and thereby increase fairness.

  - Rajiv Movva
  - Pang Wei Koh
  - Emma Pierson

  News & Views19 Apr 2024
- ### Climate change and health: understanding mechanisms will inform mitigation and prevention strategies

  The cellular and molecular mechanisms underlying the health impacts of climate change must be better understood in order to plan interventions that mitigate harm.

  - Diddier Prada
  - Andrea A. Baccarelli
  - Robbie M. Parks

  Comment19 Apr 2024
- ### Post-election responsibilities for public health in the Democratic Republic of the Congo

  - Faraan O. Rahim
  - William C. Lieber
  - Richard M. Lukelwa

  Correspondence19 Apr 2024

- Previous page
- page 1
- page 2
- page 3
- …
- page 736
- Next page

## Explore content

- Research articles
- Reviews & Analysis
- News & Comment
- Podcasts
- Current issue
- Collections

- Follow us on Facebook
- Follow us on Twitter
- Sign up for alerts
- RSS feed


## About the journal

- Aims & Scope
- Journal Information
- Journal Metrics
- About the Editors
- Statistical Advisory Panel
- Our publishing models
- Editorial Values Statement
- Editorial Policies
- Content Types
- Nature Medicine Classic Collection
- Web Feeds
- Posters
- Contact
- Research Cross-Journal Editorial Team
- Reviews Cross-Journal Editorial Team


## Publish with us

- Submission Guidelines
- For Reviewers
- Language editing services
- Submit manuscript

## Search

Search articles by subject, keyword or author

Show results from

All journals
This journal

Search

Advanced search

### Quick links

- Explore articles by subject
- Find a job
- Guide to authors
- Editorial policies

Nature Medicine (*Nat Med*)

ISSN 1546-170X (online)

ISSN 1078-8956 (print)

## nature.com sitemap

### About Nature Portfolio

- About us
- Press releases
- Press office
- Contact us

### Discover content

- Journals A-Z
- Articles by subject
- protocols.io
- Nature Index

### Publishing policies

- Nature portfolio policies
- Open access

### Author & Researcher services

- Reprints & permissions
- Research data
- Language editing
- Scientific editing
- Nature Masterclasses
- Research Solutions

### Libraries & institutions

- Librarian service & tools
- Librarian portal
- Open research
- Recommend to library

### Advertising & partnerships

- Advertising
- Partnerships & Services
- Media kits
- Branded
  content

### Professional development

- Nature Careers
- Nature 
  Conferences

### Regional websites

- Nature Africa
- Nature China
- Nature India
- Nature Italy
- Nature Japan
- Nature Middle East

- Privacy
  Policy
- Use
  of cookies
- Your privacy choices/Manage cookies
- Legal
  notice
- Accessibility
  statement
- Terms & Conditions
- Your US state privacy rights

© 2024 Springer Nature Limited

xml version="1.0" encoding="UTF-8"?
